# Supplementary material for: Corepressors SsnF and RcoA Regulate Development and Aflatoxin B1 Biosynthesis in Aspergillus flavus NRRL 3357
Source: MDPI journal article supplement (doi:10.3390/toxins14030174), 2022-02-25
Supplement: s1 [file s1]

# Supplementary Materials: Corepressors SsnF and RcoA Regulate Development and Aflatoxin B<sub>1</sub> Biosynthesis in *Aspergillus flavus* NRRL 3357

Xiaoyun Ma, Yiran Jiang, Longxue Ma, Shujuan Luo, Haolan Du <sup>1</sup>, Xu Li and Fuguo Xing

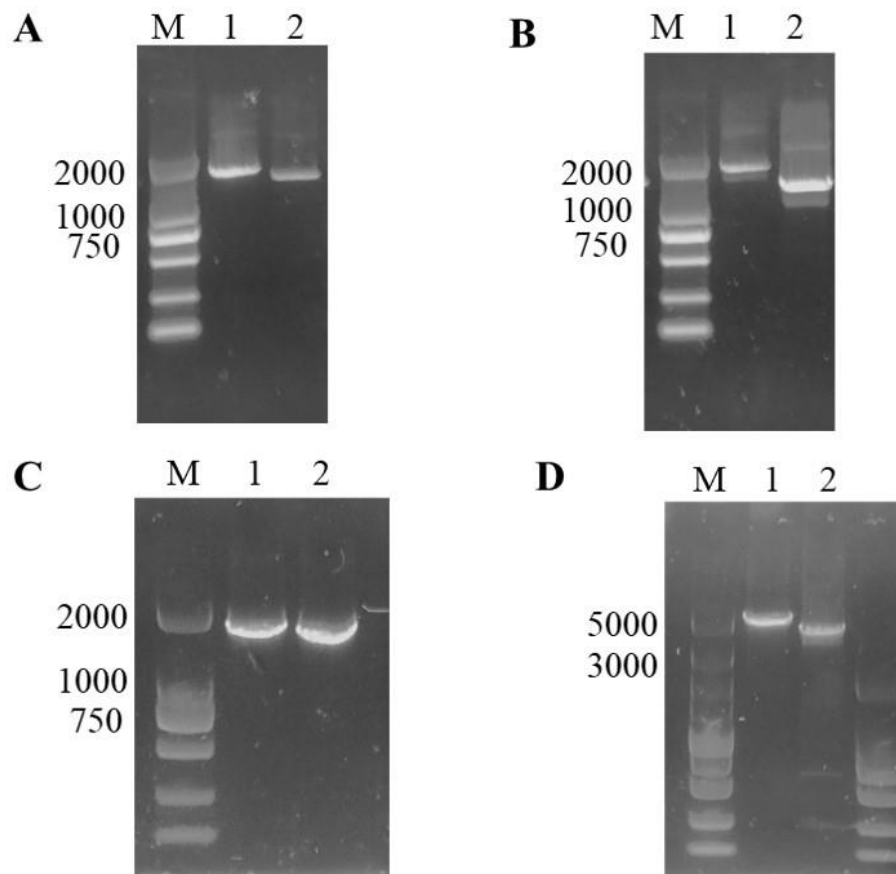

**Figure S1.** The PCR products of *ssnF* and *rcoA* flanking fragments. (A) Lane M: DL5000 Marker, Lane 1: 5' flanking region of *ssnF*, Lane 2: 3' flanking region of *ssnF*; (B) Lane M: 2000 Marker; Lane 1: 5' flanking region of *rcoA*, Lane 2: 3' flanking region of *rcoA*; (C) Lane M: 2000 Marker, Lane 1-2: *pyrG* gene; (D) Lane M: 5000 Marker, Lane 1: deletion cassette of *ssnF*, Lane 2: deletion cassette of *rcoA*.

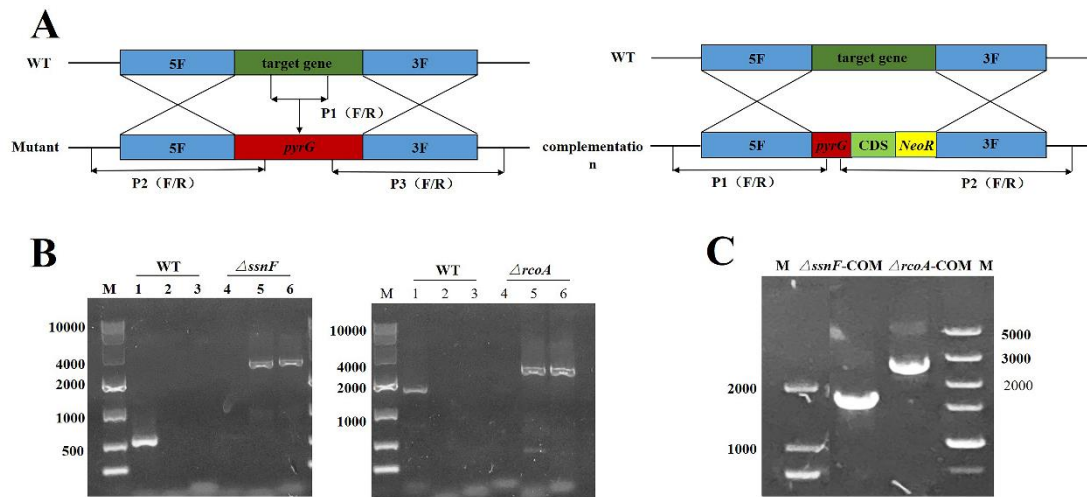

**Figure S2.** PCR verification of deletion and complementation strains. (A) Diagrammatic representation of the homologous recombination for the null-deletion and complementary strains constructions; (B) PCR verification for *ssnF* and *rcoA* deletion mutants; (C) PCR verification for the complementary strains.

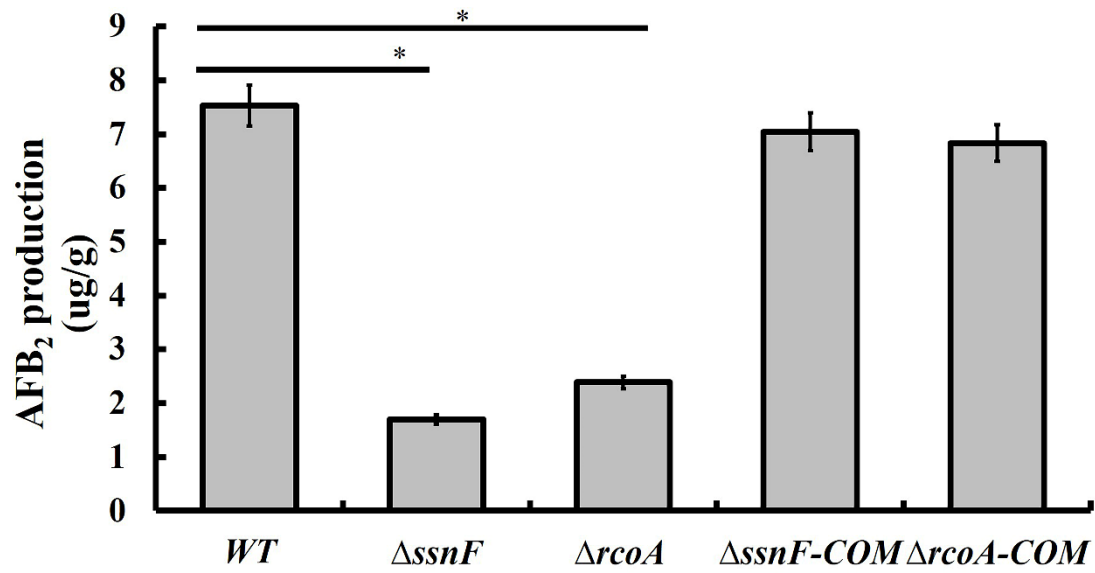

**Figure S3.** AFB<sub>2</sub> biosynthesis of different strains. Bars represent SD from three independent experiments with three replicates. \* shows a significant difference at  $p < 0.05$ .

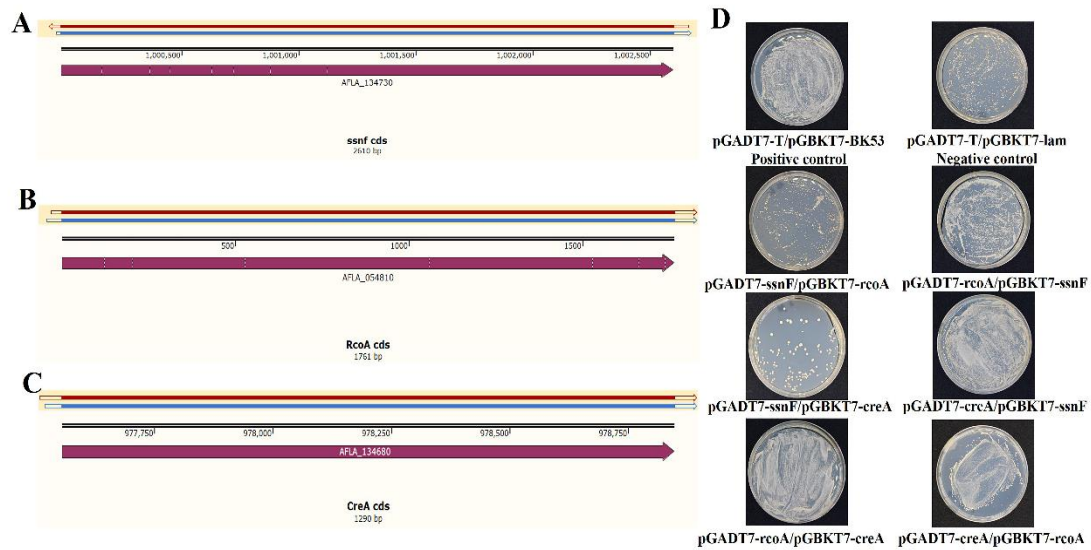

**Figure S4.** The acquisitions of CDS fragments and the Y2H strains. (A) CDS sequence of SsnF; (B) CDS sequence of RcoA; (C) CDS sequence of CreA; (D) the Y2H strains for the interaction analyses of SsnF, RcoA and CreA. Yeast cells were co-transformed with the bait plasmid and the prey plasmids, containing the CDS regions of *ssnF*, *rcoA* and *creA* genes, respectively, and were cultivated on the nutritional deficiency plates.

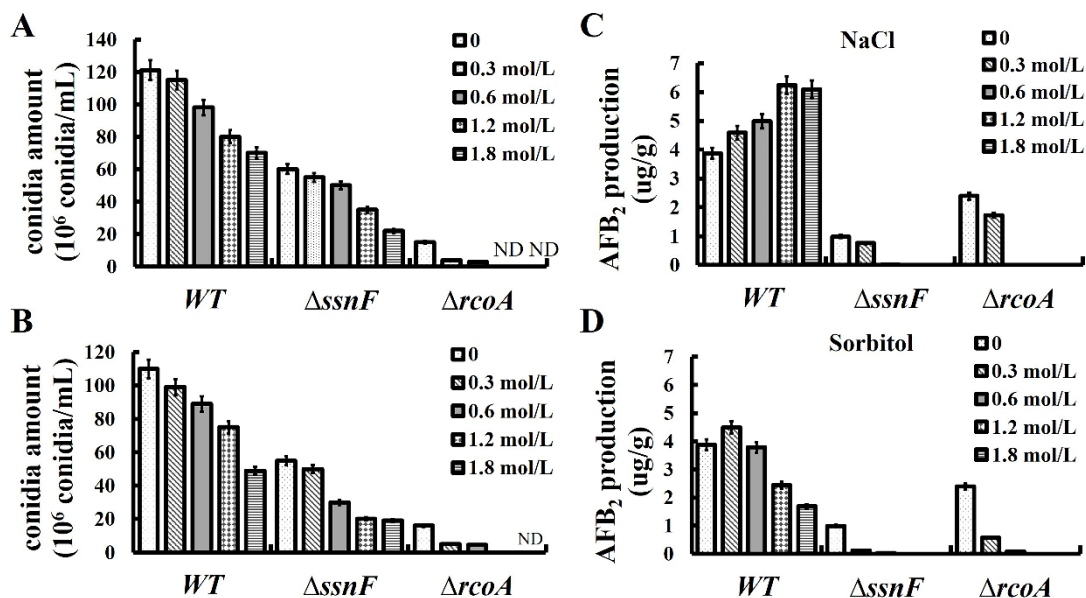

**Figure S5.** The productions of conidia and AFB<sub>2</sub> in different strains under osmotic stress. (A) conidia production of different strains with different concentrations of NaCl; (B) conidia production of different strains with different concentrations of D-sorbitol; (C) AFB<sub>2</sub> biosynthesis of different strains with different concentrations of NaCl; (D) AFB<sub>2</sub> biosynthesis of different strains with different concentrations of D-sorbitol. Bars represent SD from three independent experiments with three replicates. ND means no detected.

Table S1. PCR primers used in this study.

| Name        | Sequence (5' -3')                       | Usage                                              |
|-------------|-----------------------------------------|----------------------------------------------------|
| ssnF-5F     | gtcagacactgccctgtttc                    | Upstream homologous fragment of <i>ssnF</i> gene   |
| ssnF-5R     | tttgaagccacacctgctcggagagtattctgtgtctga |                                                    |
| ssnF-3F     | gcctcctctcagacagaaggaagatggacgtggatgag  | Downstream homologous fragment of <i>ssnF</i> gene |
| ssnF-3R     | tctgaatcggccgcaaagtc                    |                                                    |
| ssnF-cs-F   | tgcactaaggtccatgctac                    | Fusion segments                                    |
| ssnF-cs-R   | ttcggcttttctcctgacc                     |                                                    |
| RcoA-5F     | ggaccggatcgaaagaatct                    | Upstream homologous fragment of <i>rcoA</i> gene   |
| RcoA-5R     | tcagacacagaataactctctgttcaaactcgccagtgt |                                                    |
| RcoA-3F     | gcctcctctcagacagaattgctcctgagaaggtttgac | Downstream homologous fragment of <i>rcoA</i> gene |
| RcoA-3R     | aagctgactggtgtatgcac                    |                                                    |
| RcoA-cs-F   | aacagatccacggagactgt                    | Fusion segments                                    |
| RcoA-cs-R   | cagggctgggtcaaagatgca                   |                                                    |
| pyrG-F      | gagagtattctgtgtctga                     | <i>pyrG</i> gene                                   |
| pyrG-R      | attctgtctgagaggaggc                     |                                                    |
| Checkup-R   | gtcacatcagcagagacggtaac                 | Verification                                       |
| Checkdown-F | gcttggacagcaataccagact                  |                                                    |
| SsnF-TG-F   | ctgtattctgcggactaagg                    | Verification                                       |
| SsnF-TG-R   | tcaaatccattagccgcctg                    |                                                    |
| RcoA-TG-F   | attctgtctgagaggaggc                     | Verification                                       |
| RcoA-TG-R   | gggaacattaagctcccaga                    |                                                    |
| NeoR-F      | ctaaacaattcatccagtaaaa                  | Resistance gene                                    |
| NeoR-R      | atggctaaaatgagaatatcacc                 |                                                    |

Table S2. qPCR primers used in this study.

| Name  | Sequence (5'-3')                                    | Usage                              |
|-------|-----------------------------------------------------|------------------------------------|
| aflA  | F: caacgccaacgctattcgag ; R: tggatgacacgtgtgccag    | AFs biosynthesis cluster genes     |
| aflB  | F: atccactcgacatcatcgcc ; R: ttgatgtcacgtcggctgaa   |                                    |
| aflC  | F: ctgaatcaccgaccaccgaa ; R: cccatttggtagcccttt     |                                    |
| aflD  | F: gcatcgagcagggctctatt ; R: ctgggcatcagtttccgagt   |                                    |
| aflG  | F: tggcgtatgtgggtgcagaaa ; R: ccctcagcaaacatcgaacc  |                                    |
| aflK  | F: cgggtccttttcgacgatca ; R: ccattagcagctggggtgaa   |                                    |
| aflO  | F: tgggcaaacggcaaatcag ; R: tagagttatcggcgtgtcgc    |                                    |
| aflP  | F: tagagttatcggcgtgtcgc ; R: tgatgtgggactaggtccgt   |                                    |
| aflQ  | F: tcgggattcgacggttcttg ; R: ctcatctttccatgcggcg    |                                    |
| aflR  | F: tgcagtcaatggaacacgga ; R: agcgaagcagcaatagcg     |                                    |
| aflS  | F: aagtattagccctcgccagc ; R: catccagaggatacacgcc    | Diverse global regulators          |
| atfA  | F: aaactgaagactcccaggcg ; R: gtaatccgggtatccgcag    |                                    |
| atfB  | F: agcctgacctgatggctttc ; R: tggggttgcaaaaggctctgt  |                                    |
| AP-1  | F: gaagcgcagagaaagcgatg ; R: aggccttctgcaactcatcc   |                                    |
| srrA  | F: ccttaagcccttcccagggtg ; R: ggtggctcccctaacgaatc  |                                    |
| mtfA  | F: tactcgcaaacccccatgac ; R: aggattcaaccggcgaagag   |                                    |
| msnA  | F: ctgacacaccaatcaacg ; R: gaagtgtctgaccgagtcca     |                                    |
| veA   | F: atgagacgtcggggagagaa ; R: ccgtgtgtgtactggtgat    |                                    |
| creA  | F: caccggcttctcagtggat ; R: agacgaggccatggtagagt    |                                    |
| creB  | F: cacttgacaggggtgcgaaac ; R: gcgaagagtatttgcagcg   |                                    |
| creC  | F: tcaactcaccctgcctcta ; R: cgccttctctcccgatcaaa    | Related genes in carbon metabolism |
| creD  | F: ggcacacttctcccggttat ; R: tcaactcggatgctggttcc   |                                    |
| snf1  | F: ccctgaaccagtgcaatca ; R: tgtccggatcttgggagaga    |                                    |
| snf4  | F: agctaagcgggaaggacatcg ; R: ctctccgagaatgcctagcg  |                                    |
| hulA  | F: cctattgtctctgcggatgct ; R: tgggttgacgaggattgtctg |                                    |
| schA  | F: cggactgtttgagccgatct ; R: gattgaacctccccatggca   |                                    |
| reg1  | F: tgcgcttctacacgacttt ; R: tcaaccggctttcccttctc    |                                    |
| gal83 | F: ggttcaggggcggagattta ; R: gttactggacccgcaagact   |                                    |
| rcoA  | F: gagagagcccccgtaattc ; R: atctgaagctgctcgtgtc     |                                    |
| ssnF  | F: gtcttgcaacagcttgggtg ; R: cttggaaacctacctgcgt    | Related genes in the hydrolase     |
| alcR  | F: tatcagttctgagctccgc ; R: ccccggaagtgtagtgt       |                                    |
| alcA  | F: atacgggattttggccctcc ; R: atctgacgggtgatgcagg    |                                    |
| amyR  | F: ctacgctttcattgccgctc ; R: cataggatgtccgtcgaggc   |                                    |
| amyA  | F: tcgtgtcgagatggcaaaaca ; R: attcgtggctgatcgtggtt  |                                    |
| xlnR  | F: actctgctgaaaaccctccg ; R: gcatgctaaaggacgcgaag   |                                    |
| xlnA  | F: ggtagcagagggtatgtgcc ; R: tggttgtgtgactgcgat     |                                    |
| eglA  | F: gatgtcgaccaggggtgaagg ; R: gtccttgaggtgacatcgg   |                                    |
| eglC  | F: gccacggttatgtgtctgga ; R: gccaatggtatctggggcat   |                                    |
| prnB  | F: ctttgcttaggctggctct ; R: agttgatgacaaggctggca    |                                    |
| prnC  | F: aggtcttcaagtgtctggcg ; R: agccccttgattctcaaccg   |                                    |
| prnD  | F: cgaacaatgtgtggcagcaa ; R: ccaagcagcacacctgtga    |                                    |
| cbhA  | F: cataccctcaacatgcaggc ; R: aacggacgacgaaggagatg   |                                    |
